# Supplementary material for: Two human metabolites rescue a C. elegans model of Alzheimer’s disease via a cytosolic unfolded protein response
Source: PubMed Central journal article supplement (PMC8263720; doi:10.1038/s42003-021-02218-7), 2021-07-07
Supplement: 42003_2021_2218_MOESM1_ESM.pdf [file 42003_2021_2218_MOESM1_ESM.pdf]

**Two human metabolites rescue a *C. elegans* model of Alzheimer's disease  
via a cytosolic unfolded protein response**

Priyanka Joshi<sup>1,4,\*</sup>, Michele Perni<sup>1</sup>, Ryan Limbocker<sup>1,3</sup>, Benedetta Mannini<sup>1</sup>, Sam Casford<sup>1</sup>, Sean Chia<sup>1</sup>, Johnny Habchi<sup>1</sup>, Johnathan Labbadia<sup>2</sup>, Christopher M Dobson<sup>1</sup> and Michele Vendruscolo<sup>1,\*</sup>

*<sup>1</sup>Centre for Misfolding Diseases, Yusuf Hamied Department of Chemistry,  
University of Cambridge, Cambridge CB2 1EW, UK*

*<sup>2</sup>Institute of Healthy Ageing, Department of Genetics, Evolution and Environment,  
University College London, London WC1E 6BT, UK*

*<sup>3</sup>Current address: Department of Chemistry and Life Science, United States Military  
Academy, West Point, NY 10996, USA*

*<sup>4</sup>Current address: The California Institute for Quantitative Biosciences (QB3-Berkeley),  
University of California, Berkeley, CA 94720, USA*

**Supplementary Information**

\*Correspondence to: [prijoshi@berkeley.edu](mailto:prijoshi@berkeley.edu), [mv245@cam.ac.uk](mailto:mv245@cam.ac.uk)

**Figure S1. (a-f)** Effects of the six metabolites identified in this work on *C. elegans* GMC motility at various stages (day 1, 3, 4 and 5) of adulthood at concentrations 0, 1, 5 and 10  $\mu\text{M}$ . **(g)** Effects of metabolites at day 5 of adulthood at 10  $\mu\text{M}$  metabolites or 200  $\mu\text{M}$  ThT. **(h-i)** Extended data from Figure 3(d-e) shows a dose-dependent effect (at concentrations 5, 10, 15 and 25  $\mu\text{M}$ ) of carnosine and kynurenic acid treatment on *C. elegans* GMC motility at day 5 of adulthood. Error bars indicate SEM. Statistics were performed using one-way ANOVA, Dunnett's multiple comparisons against the untreated A $\beta$ 24 group using GraphPad Prism; \*\*\*\*,  $p < 0.0001$ ; \*\*\*,  $p < 0.001$ ; \*\*,  $p < 0.01$ ; \*,  $p < 0.05$ ).

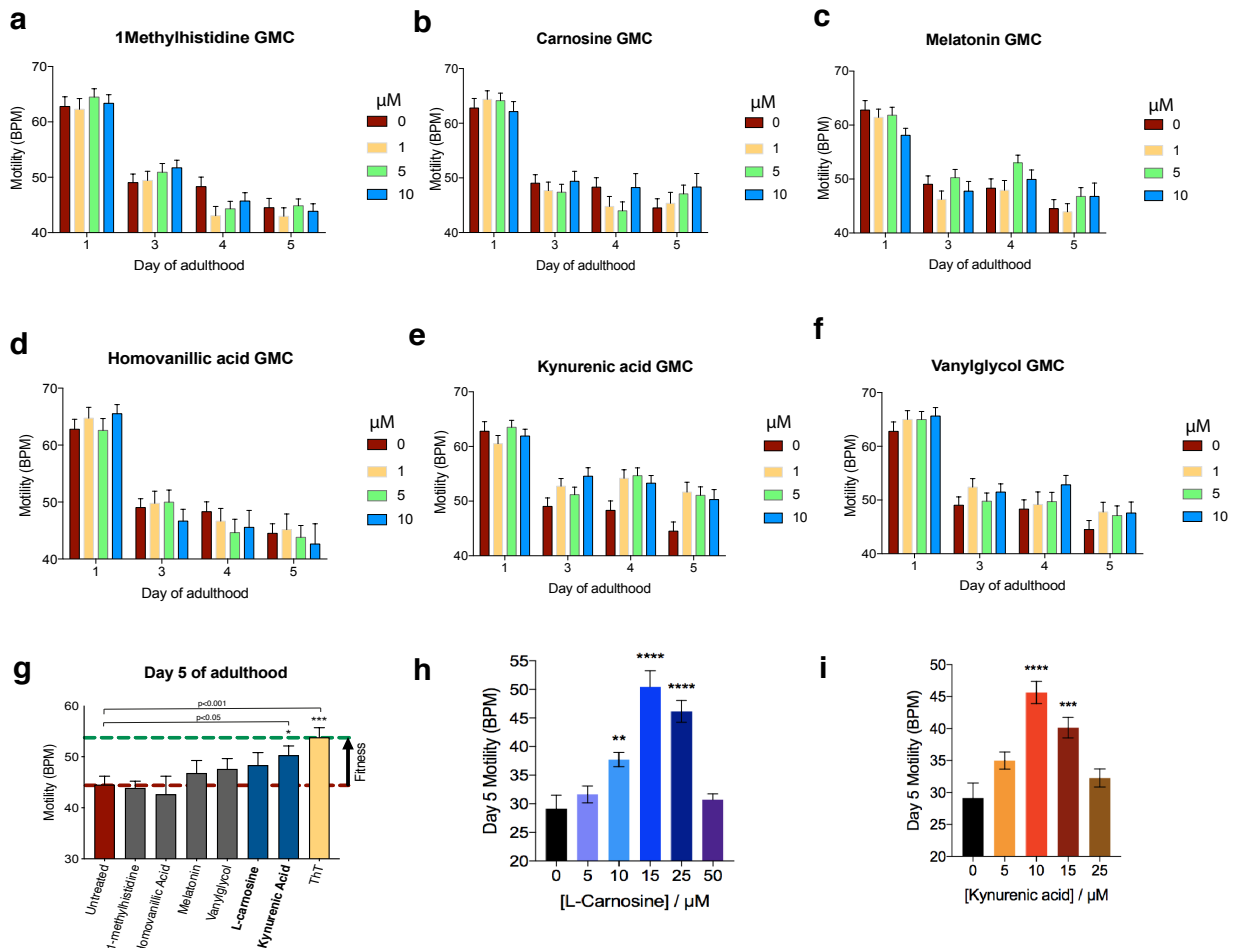

**Figure S2.** The amyloid-binding dye thioflavin T (ThT) increases motility in *C. elegans* by reducing A $\beta$ 42-associated toxicity. ThT increases lifespan in *C. elegans* by reducing A $\beta$ 42-associated toxicity [1]. Here, we see a dose-dependent increase in worm motility (0, 50, 100 and 200  $\mu$ M) at day 5. X-axis depicts days of adulthood and y axis bends per minute (BPM).

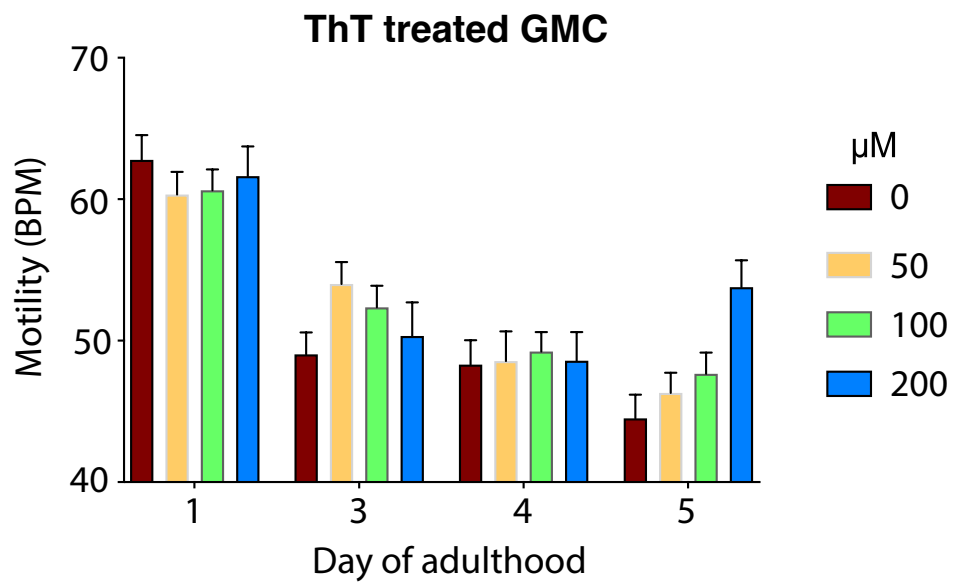

**Figure S3.** Kinetic profiles of the aggregation of a 2 $\mu$ M A $\beta$ 42 sample in the absence (black) and the presence of 20  $\mu$ M, 50  $\mu$ M, 100  $\mu$ M and 500  $\mu$ M concentrations of carnosine or kynurenic acid (represented in different colours). Note that this experiment was performed at the same time as shown in Fig. 4, and the kinetic profiles of A $\beta$ 42 only has been repeated on this plot for the purpose of clarity. Error bars are expressed as the standard deviations from 3 technical replicates.

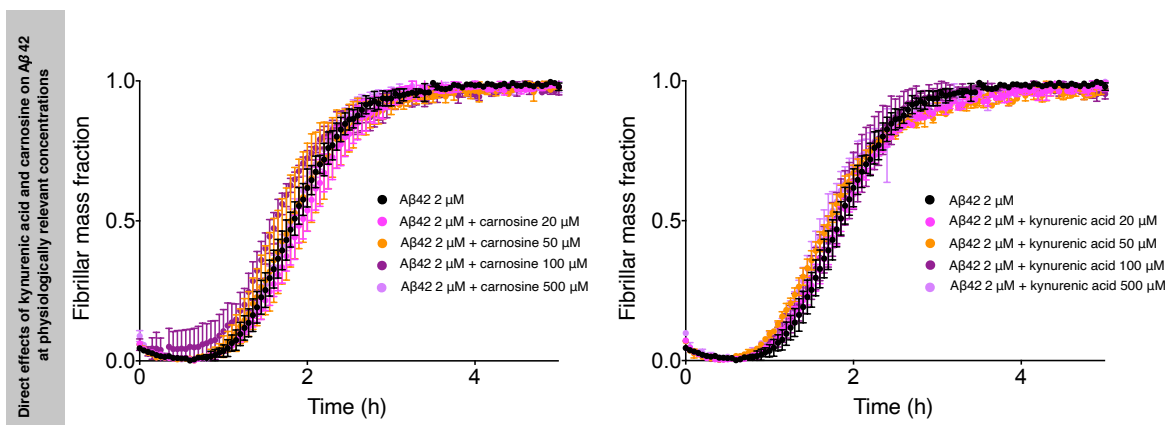

**Figure S4.** Carnosine and kynurenic acid do not show overt effects on the motility of normal wild type N2 worms. We tested a range of concentrations of carnosine (a) and kynurenic acid (b) on worm (N2) motility as a function of age (Days 3, 5 and 7), and did not observe any overt changes in motility. For clarity, total fitness score of Day 5 N2 worms is shown in (c).

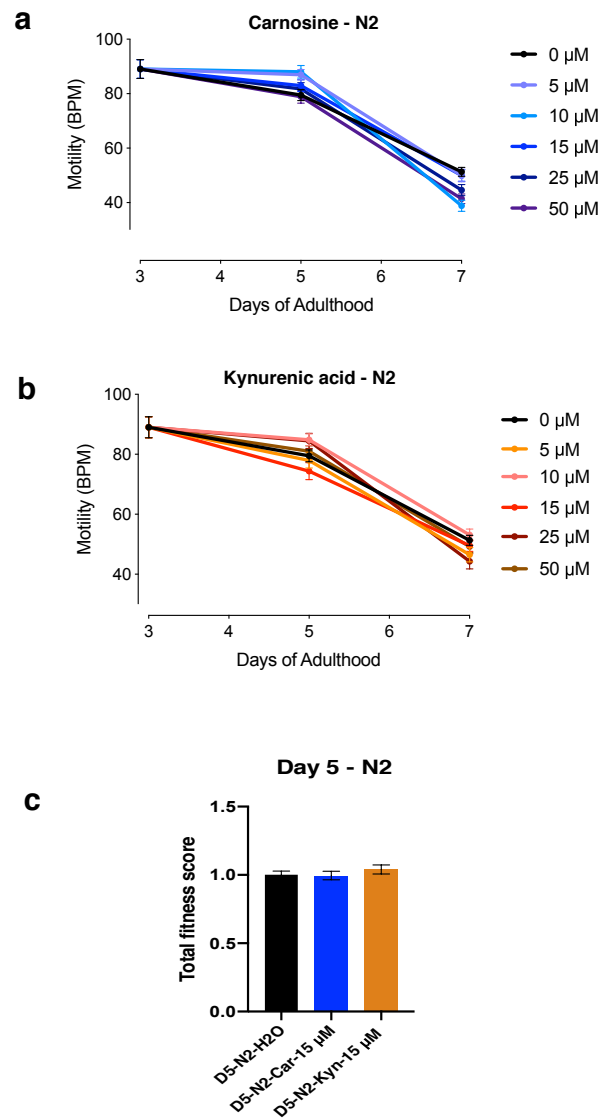

**Figure S5.** Carnosine and kynurenic acid activate a cytosolic unfolded protein response through a HSF-1 dependent mechanism. Uncropped full blots supporting data in Figure 5. (a) HSF-1 (b) HSP-90 (c) HSP-70 (d) DNJ-12 (e) DNJ-13 (f) DNJ-19.

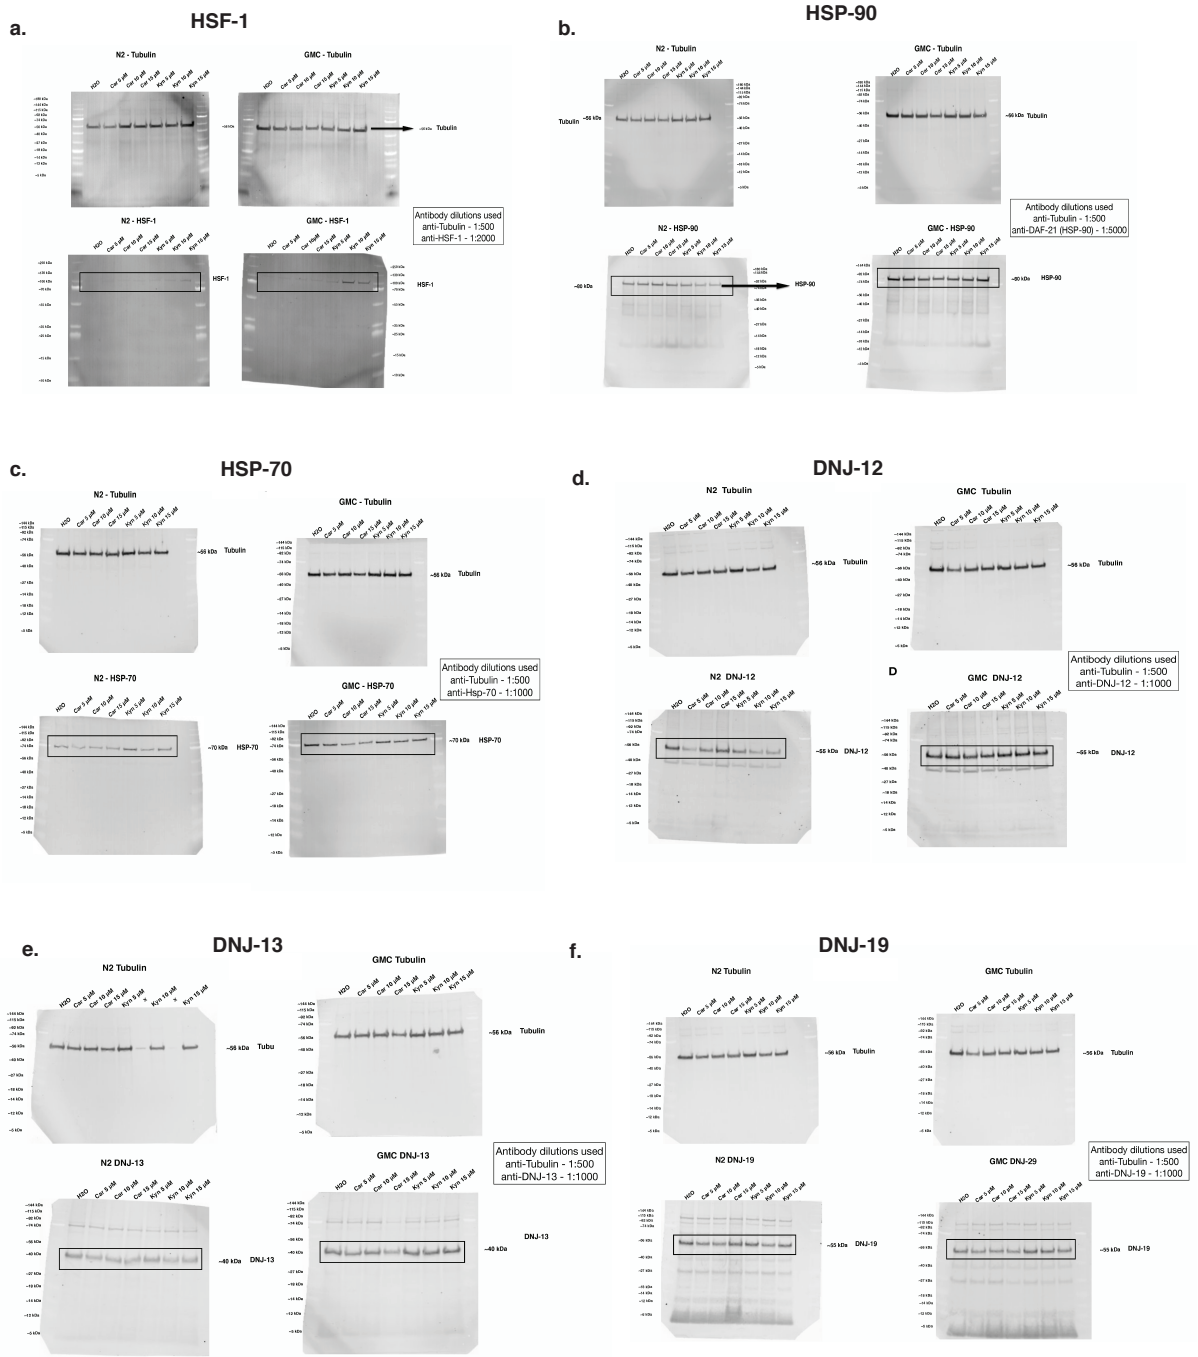

## References

[1] Alavez, S., et al., Amyloid-binding compounds maintain protein homeostasis during ageing and extend lifespan. *Nature*, 2011. **472**(7342): p. 226-9.
