# Supplementary material for: Two human metabolites rescue a C. elegans model of Alzheimer’s disease via a cytosolic unfolded protein response
Source: PubMed Central journal article supplement (PMC8263720; doi:10.1038/s42003-021-02218-7), 2021-07-07
Supplement: 42003_2021_2218_MOESM2_ESM.pdf [file 42003_2021_2218_MOESM2_ESM.pdf]

## **Description of Additional Supplementary Files**

**File name:** Supplementary data 1

**Description:** Dysregulated Metabolites in protein misfolding diseases.

**File name:** Supplementary data 2

**Description:** Source data for Figure 3-8.
